# Supplementary material for: Sirtuin 6 maintains epithelial STAT6 activity to support intestinal tuft cell development and type 2 immunity
Source: PubMed Central journal article supplement (PMC9440928; doi:10.1038/s41467-022-32846-4), 2022-09-03
Supplement: 41467_2022_32846_MOESM1_ESM.pdf [file 41467_2022_32846_MOESM1_ESM.pdf]

## **Supplementary Information**

### **Sirtuin 6 maintains epithelial STAT6 activity to support intestinal tuft cell development and type 2 immunity**

Xiwen Xiong<sup>\*</sup>, Chenyan Yang, Wei-Qi He, Jiahui Yu, Yue Xin, Xinge Zhang, Rong Huang, Honghui Ma, Shaofang Xu, Zun Li, Jie Ma, Lin Xu, Qunyi Wang, Kaiqun Ren, Xiaoli S. Wu, Christopher R. Vakoc, Jiateng Zhong, Genshen Zhong, Xiaofei Zhu, Yu Song, Hai-Bin Ruan, Qingzhi Wang<sup>\*</sup>

<sup>\*</sup>To whom correspondence should be addressed.

Email: [xwxiong@xxmu.edu.cn](mailto:xwxiong@xxmu.edu.cn) (Xiwen Xiong), [wqzmg1@126.com](mailto:wqzmg1@126.com) (Qingzhi Wang)

## Supplementary Figure 1

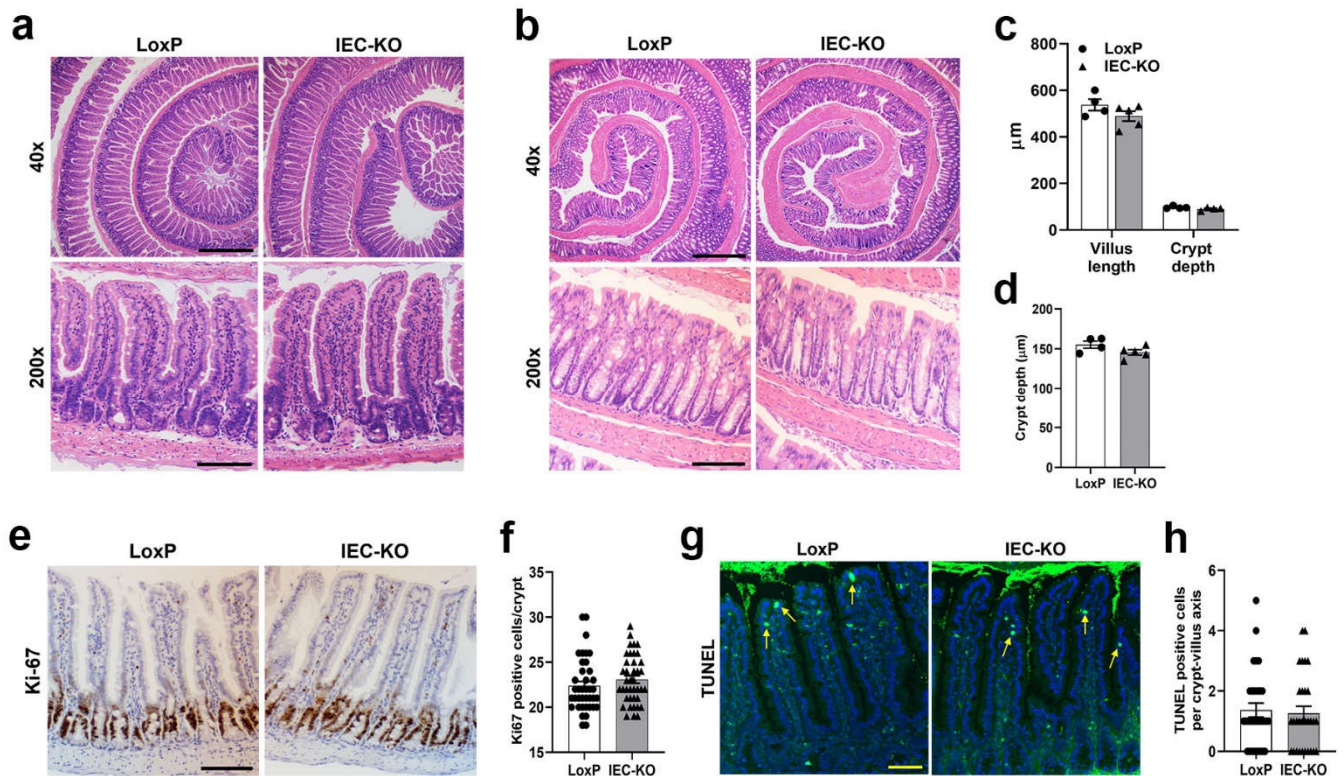

**Supplementary Fig. 1. IEC-KO mice do not display abnormalities in intestinal mucosal architecture.** 2-3-month-old male LoxP and IEC-KO mice were subjected to the following assays. **(a, b)** Representative H&E images of jejunum (a) and colon (b). **(c)** Analyses of the jejunal villus length and crypt depth.  $n=4$  (LoxP) and 5 (IEC-KO) mice for villus length,  $n=4$  mice/group for crypt depth; 30 villi or 20 crypts counted for each mouse. **(d)** Analysis of the colonic crypt depth.  $n=4$  (LoxP) and 5 (IEC-KO) mice; 30 crypts counted for each mouse. **(e)** Immunostaining of Ki67 in the jejunum. **(f)** Quantification of Ki67 positive cells shown in (e).  $n=40$  crypts/group. **(g)** TUNEL staining in the jejunum with arrows denoting positive nuclei. **(h)** Quantification of TUNEL positive cells shown in (g).  $n=30$  crypt-villus units/group. Data are presented as mean  $\pm$  SEM. Statistical analyses were carried out using two-tailed unpaired *t* test. Scale bars, 500 $\mu\text{m}$  in (a, b, upper), 100 $\mu\text{m}$  in (a, b, lower and e); 50 $\mu\text{m}$  in (g). Source data are provided as a Source Data file.

## Supplementary Figure 2

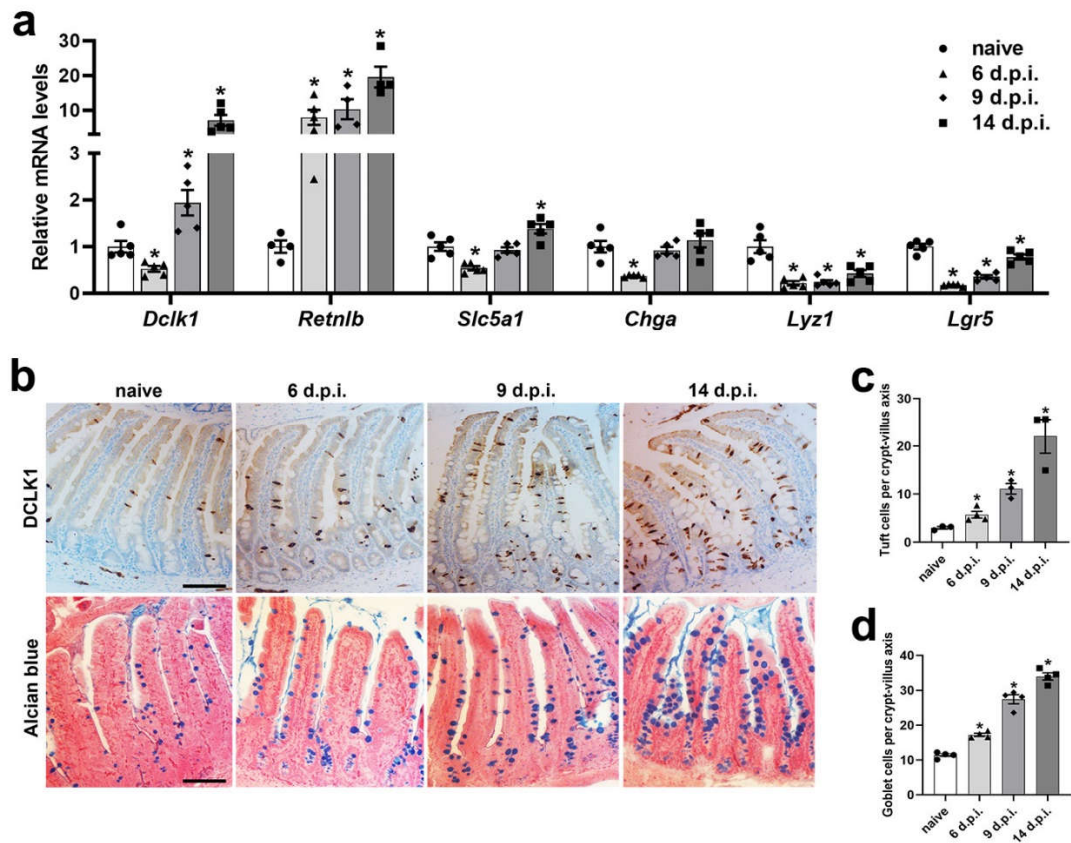

**Supplementary Fig.2. *H. poly* infection leads to hyperplasia of intestinal tuft and goblet cells in mice.** 2-month-old C57BL/6J male mice were infected with *H. poly* and analyzed on indicated days post-infection. **(a)** qPCR analysis of IEC cell markers expression in the jejunal IECs. n=5 mice/group; *Dclk1*,  $p=0.0151$  (6 dpi),  $0.022$  (9 dpi),  $0.0171$  (14 dpi); *Retnlb*,  $p=0.0328$  (6 dpi),  $0.0481$  (9 dpi),  $0.0086$  (14 dpi); *Slc5a1*,  $p=0.0045$  (6 dpi),  $0.0023$  (14 dpi); *Chga*,  $p=0.0066$  (6 dpi); *Lyz1*,  $p=0.0032$  (6 dpi),  $0.0039$  (9 dpi),  $0.0101$  (14 dpi); *Lgr5*,  $p=0.0001$  (6 dpi),  $<0.0001$  (9 dpi),  $0.026$  (14 dpi); **(b)** Tuft and goblet cells were examined by DCLK1 immunostaining and Alcian blue staining, respectively in the jejunum (200X). **(c, d)** Quantification of tuft and goblet cells shown in (b). n=3, 4, 3, 3 mice/group, respectively in (c), n=4 mice/group in (d); 40 (c) and 20 (d) crypt-villus units counted for each mouse;  $p=0.0224$  (6 dpi),  $0.014$  (9 dpi),  $0.0329$  (14 dpi) in (c);  $p<0.0001$  (6 dpi),  $0.0005$  (9 dpi),  $<0.0001$  (14 dpi) in (d). Data are presented as mean  $\pm$  SEM. All  $p$  values were generated by two-tailed unpaired  $t$  test.  $*p<0.05$  vs naive. Scale bars,  $100\mu\text{m}$ . Source data are provided as a Source Data file.

### Supplementary Figure 3

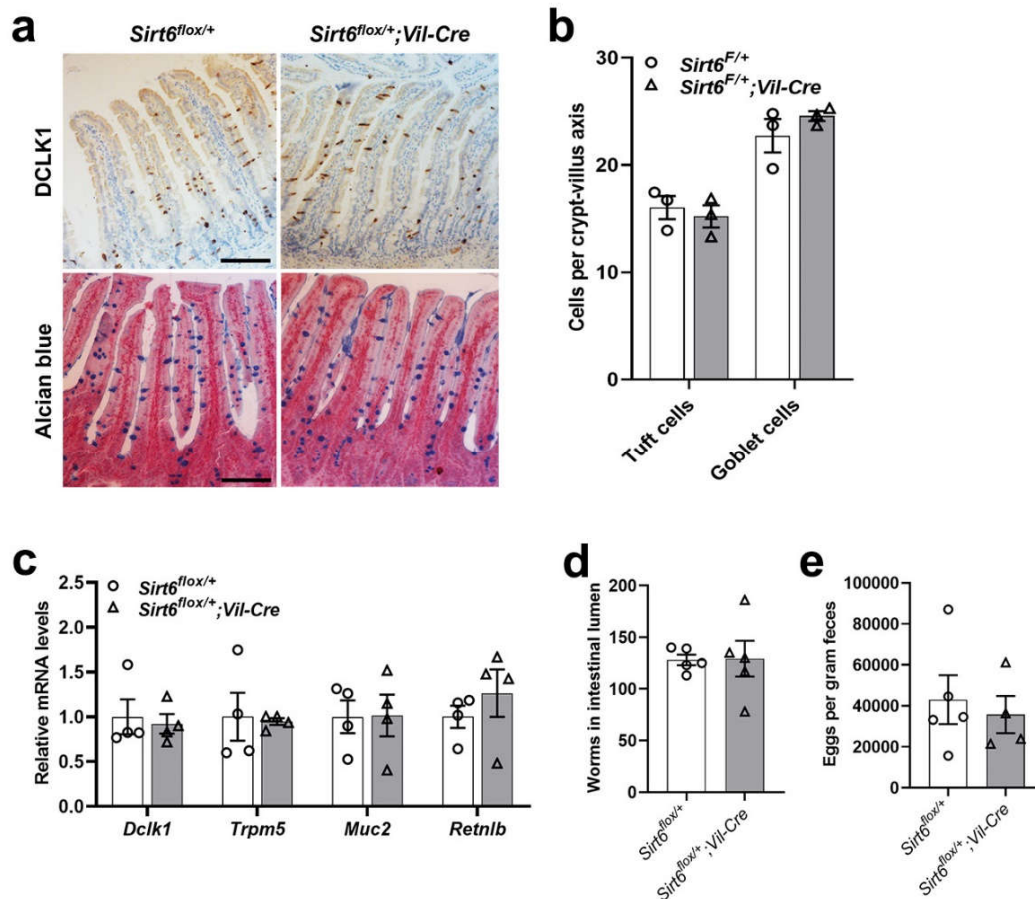

**Supplementary Fig.3. *Sirt6<sup>flox/+</sup>;Vil-Cre* mice exhibit normal anti-helminth responses.** 2-month-old male *Sirt6<sup>flox/+</sup>* and *Sirt6<sup>flox/+</sup>;Vil-Cre* mice were infected with *H.poly* and analyzed on day 14 post-infection. **(a)** Tuft and goblet cells were examined by DCLK1 immunostaining and Alcian blue staining, respectively in the jejunum (200X). **(b)** Quantification of tuft cells and goblet cells shown in (a). n=3 mice/group; 15 crypt-villus units counted for each mouse. **(c)** qPCR analysis of tuft and goblet cell markers expression in the jejunal IECs. n=4 mice/group. **(d, e)** Analysis of parasite burden by quantification of adult worms in intestinal lumen (d) and eggs in feces (e). n=5 mice/group in (d), n=5 (*Sirt6<sup>flox/+</sup>*) and 4 (*Sirt6<sup>flox/+</sup>;Vil-Cre*) mice in (e). Data are presented as mean  $\pm$  SEM. Statistical analyses were carried out using two-tailed unpaired *t* test. Scale bars, 100 $\mu$ m. Source data are provided as a Source Data file.



## Supplementary Figure 4

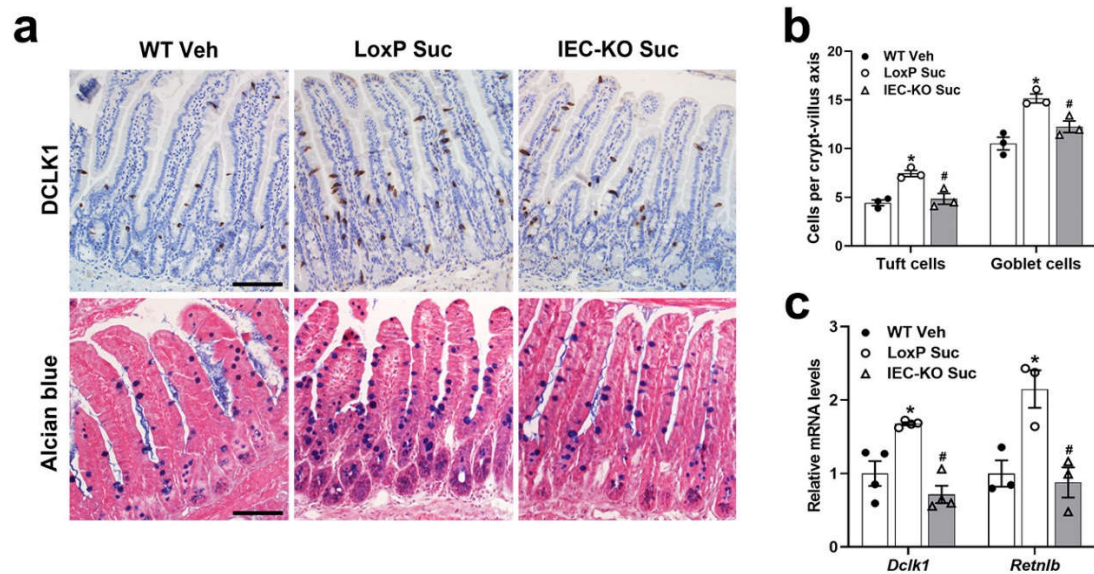

### Supplementary Fig.4. Deletion of *Sirt6* in IECs leads to impaired succinate-induced epithelial responses.

4-month-old male LoxP and IEC-KO mice were given 150mM succinate and WT mice were given control water for 7 days. **(a)** Tuft and goblet cells were examined by DCLK1 immunostaining and Alcian blue staining, respectively in the jejunum (200X). **(b)** Quantification of tuft cells and goblet cells shown in (a). n=3 mice/group; 15 crypt-villus units counted for each mouse; WT Veh vs LoxP Suc,  $p=0.0024$  (tuft cell), 0.0059 (goblet cell); LoxP Suc vs IEC-KO Suc,  $p=0.024$  (tuft cell), 0.02 (goblet cell). **(c)** qPCR analysis of tuft and goblet cell markers expression in the jejunal IECs. n=4 (*Dclk1*) and 3 (*Retnlb*) mice/group; WT Veh vs LoxP Suc,  $p=0.0267$  (*Dclk1*), 0.0253 (*Retnlb*); LoxP Suc vs IEC-KO Suc,  $p=0.0031$  (*Dclk1*), 0.0193 (*Retnlb*). Data are presented as mean  $\pm$  SEM. All  $p$  values were generated by two-tailed unpaired  $t$  test. \* $p<0.05$  vs WT Veh, # $p<0.05$  vs LoxP Suc. Scale bars, 100 $\mu$ m. Source data are provided as a Source Data file.

## Supplementary Figure 5

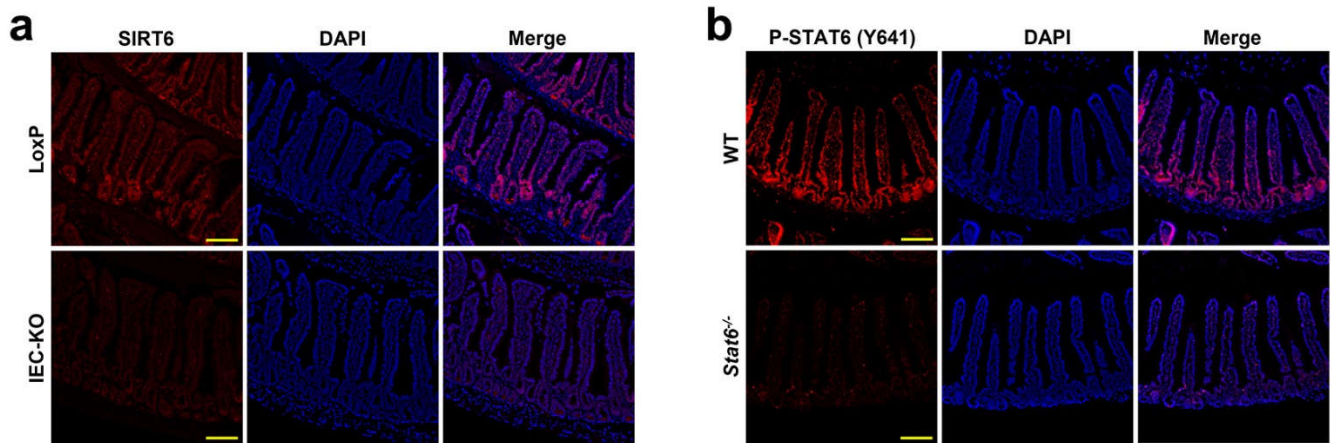

**Supplementary Fig.5. Validation of specificity of anti-SIRT6 and anti-P-STAT6 (Y641) by immunostaining. (a)** Immunostaining for SIRT6 in the jejunum of LoxP and IEC-KO mice. **(b)** Immunostaining for P-STAT6 (Y641) in the jejunum of WT and *Stat6*<sup>-/-</sup> mice. Scale bars, 100 $\mu$ m. Experiments were repeated two times for (a) and (b).

## Supplementary Figure 6

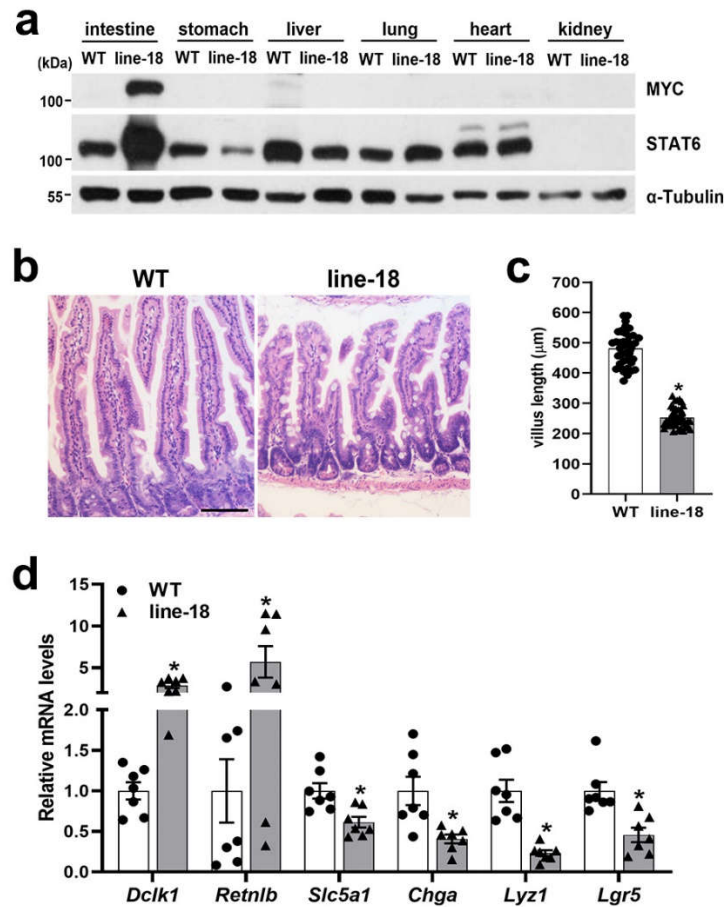

**Supplementary Fig.6. Phenotypic characterization of TgSTAT6<sup>vt</sup>-line18 mice.** 2-month-old male WT and line-18 mice were subjected to the following analyses. **(a)** Western blot analysis of transgene STAT6<sup>vt</sup> expression in different tissues. **(b)** Representative H&E images of the jejunum. **(c)** Analysis of the jejunal villus length. n=40 villi/group;  $p < 0.0001$ . **(d)** qPCR analysis of IEC cell markers expression in the jejunal IECs. n=7 mice/group;  $p = 0.0007$  (*Dclk1*),  $0.0476$  (*Retnlb*),  $0.0067$  (*Slc5a1*),  $0.0138$  (*Chga*),  $0.0011$  (*Lyz1*),  $0.0025$  (*Lgr5*). Data are presented as mean  $\pm$  SEM. All  $p$  values were generated by two-tailed unpaired  $t$  test. \* $p < 0.05$ . Scale bars, 100 $\mu$ m. Source data are provided as a Source Data file.

## Supplementary Figure 7

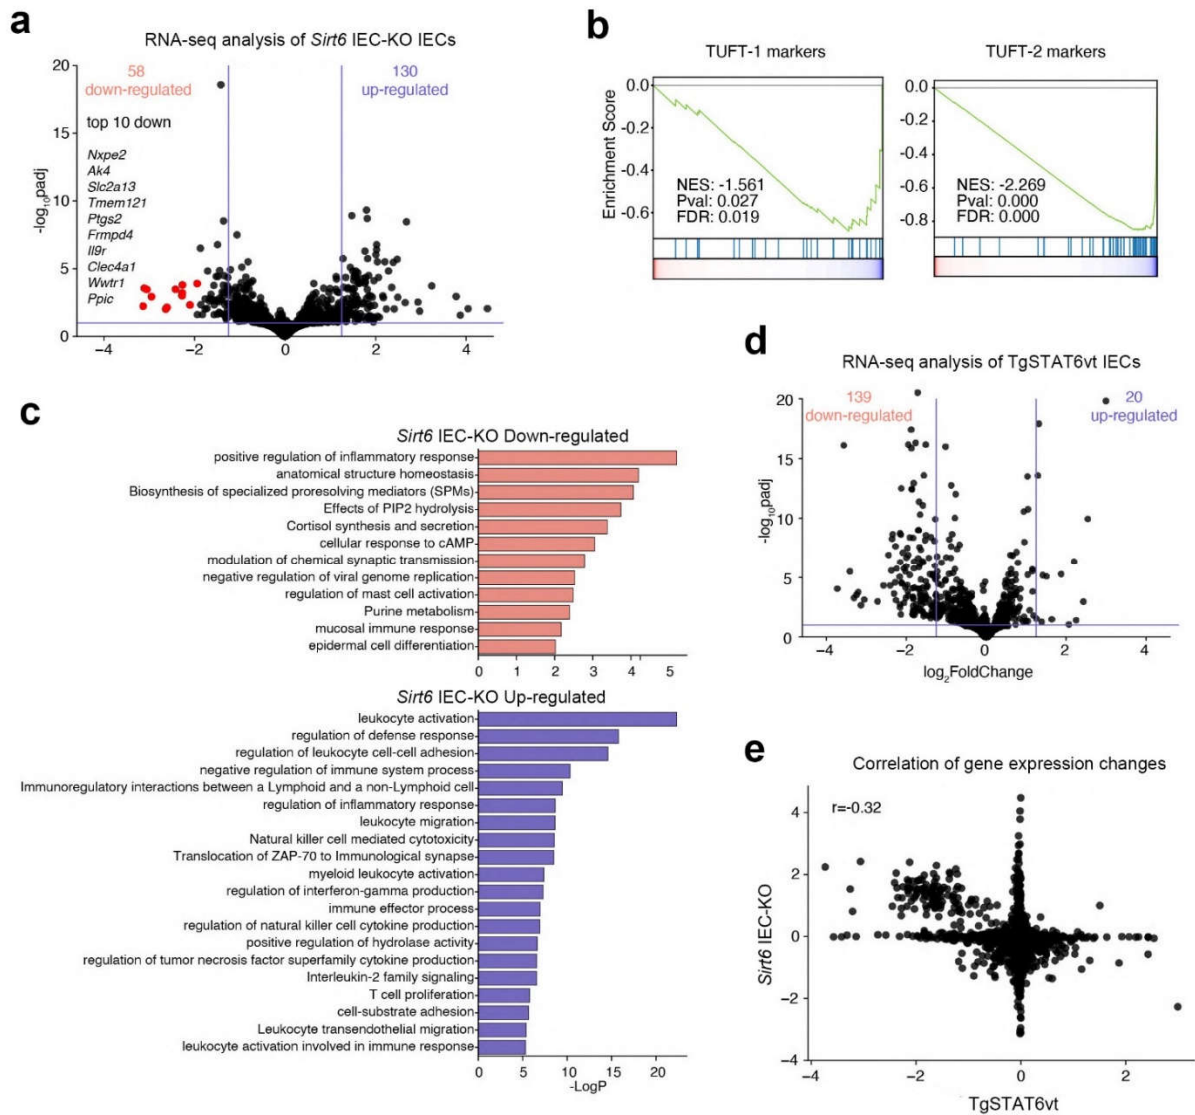

**Supplementary Fig.7. RNA-seq analysis reveals that epithelial deletion of *Sirt6* reduces the expression of tuft cell identity genes.** 2-month-old male LoxP&IEC-KO mice and WT&TgSTAT6vt mice were subjected to IECs isolation and RNA-seq analysis. **(a)** A volcano plot illustrating differentially expressed gene ( $\log_2(\text{fold-change})$  from DESeq2) in IECs from IEC-KO mice versus LoxP mice, with top 10 down-regulated genes highlighted in red.  $n=3$  mice/group. **(b)** Gene set enrichment analysis (GSEA) of downregulated genes ( $n=58$ ) in IECs from IEC-KO versus LoxP mice with respect to tuft-1 and tuft-2 marker genes defined by Harber *et al.* (Nature. 551(7680):333-339). **(c)** Ontology analysis of the 58 significantly down-regulated and 130 upregulated genes in IECs from IEC-KO mice using Metascape. GO terms are ranked by their significance (Benjamini-Hochberg corrected  $p$  value). **(d)** A volcano plot illustrating differentially expressed genes ( $\log_2(\text{fold-change})$  from DESeq2) in IECs from TgSTAT6vt versus WT mice.  $n=3$  mice/group. **(e)** RNA-seq comparison analysis. Scatterplot depicts the  $\log_2(\text{fold-change})$  (from DESeq2) of IEC-KO versus LoxP or TgSTAT6vt versus WT.



## Supplementary Figure 8

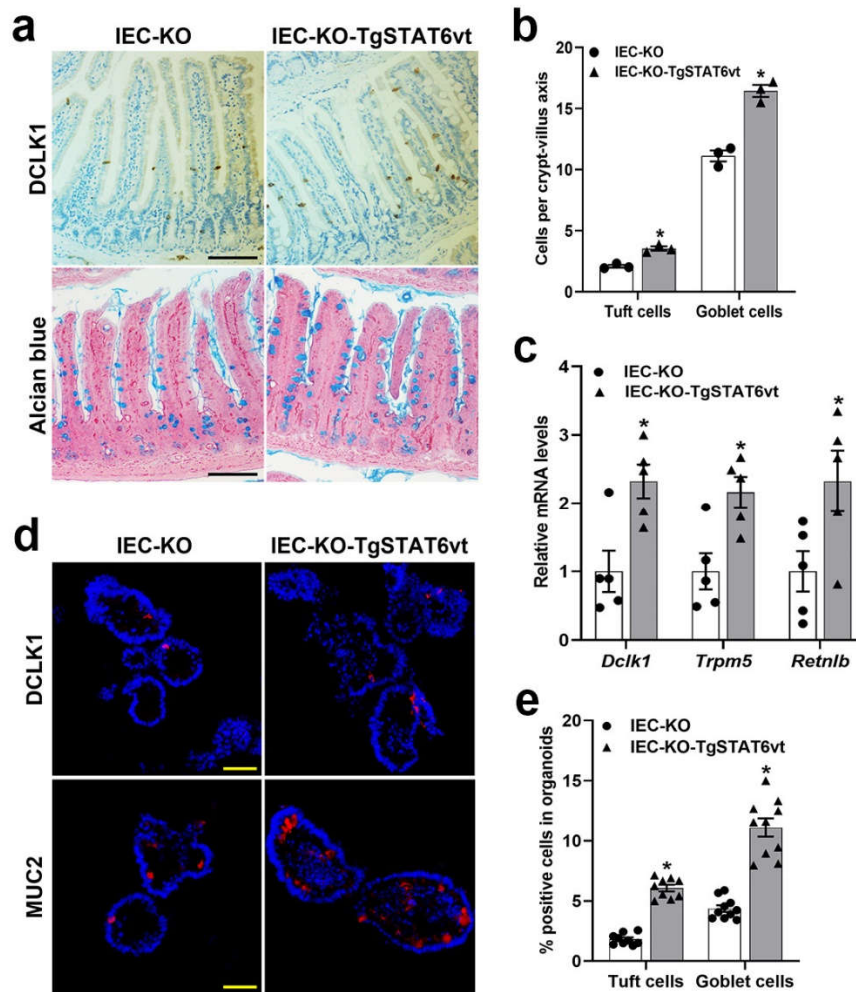

**Supplementary Fig.8. Ectopic expression of STAT6vt in the intestinal epithelium promotes tuft and goblet cell differentiation in IEC-KO mice.** 2-3-month-old male IEC-KO and IEC-KO-TgSTAT6vt mice were subjected to the following assays. **(a)** Tuft and goblet cells were examined by DCLK1 immunostaining and Alcian blue staining, respectively in the jejunum (200X). **(b)** Quantification of tuft and goblet cells shown in (a).  $n=3$  mice/group; 50 crypt-villus units counted for each mouse;  $p=0.0042$  (tuft cell), 0.0014 (goblet cell). **(c)** qPCR analysis of *Dclk1*, *Trpm5* and *Retnlb* expression in the jejunal IECs.  $n=5$  mice/group;  $p=0.0101$  (*Dclk1*), 0.0103 (*Trpm5*), 0.043 (*Retnlb*). **(d)** Tuft and goblet cells were labelled by anti-DCLK1 and anti-Muc2, respectively, in frozen sections of organoids (200X). **(e)** Quantification of tuft and goblet cells shown in (d).  $n=9$  (tuft cell) and 10 (goblet cell) organoids/group;  $p<0.0001$  (tuft, goblet cell). Data are presented as mean  $\pm$  SEM. All  $p$  values were generated by two-tailed unpaired  $t$  test. \* $p<0.05$ . Scale bars, 100 $\mu$ m in (a); 50 $\mu$ m in (d). Source data are provided as a Source Data file.

## Supplementary Figure 9

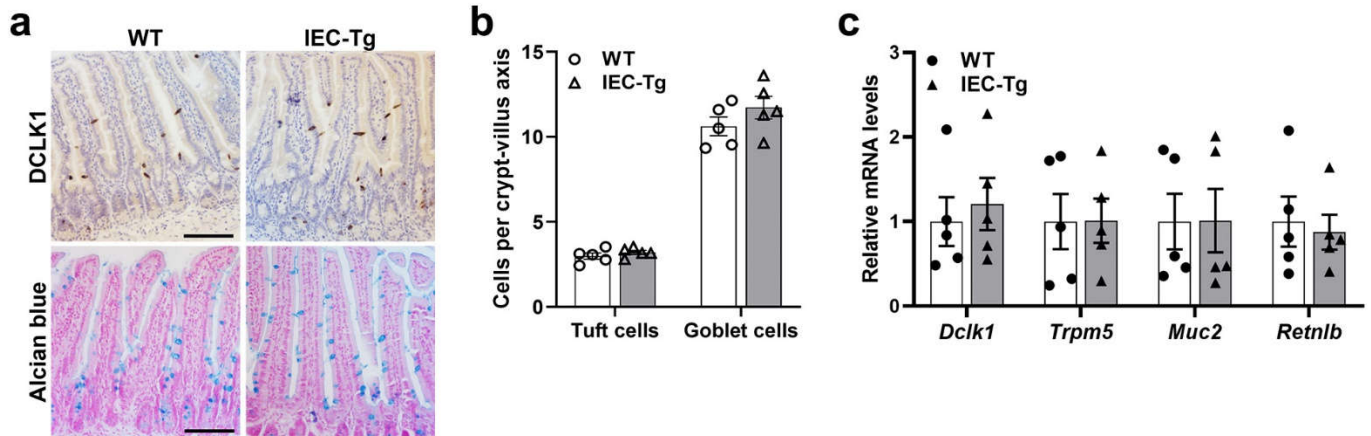

**Supplementary Fig.9. IEC-Tg and WT mice exhibit comparable tuft and goblet cell abundance in the naïve state.** 2-month-old male WT and IEC-Tg mice were subjected to following analyses. **(a)** Tuft and goblet cells were examined by DCLK1 immunostaining and Alcian blue staining, respectively in the jejunum (200X). **(b)** Quantification of tuft and goblet cells shown in (a). n=5 mice/group; 30 crypt-villus units counted for each mouse. **(c)** qPCR analysis of tuft and goblet cell markers expression in the jejunal IECs. n=5 mice/group. Data are presented as mean ± SEM. Statistical analyses were carried out using two-tailed unpaired *t* test. Scale bars, 100µm. Source data are provided as a Source Data file.

## Supplementary Figure 10

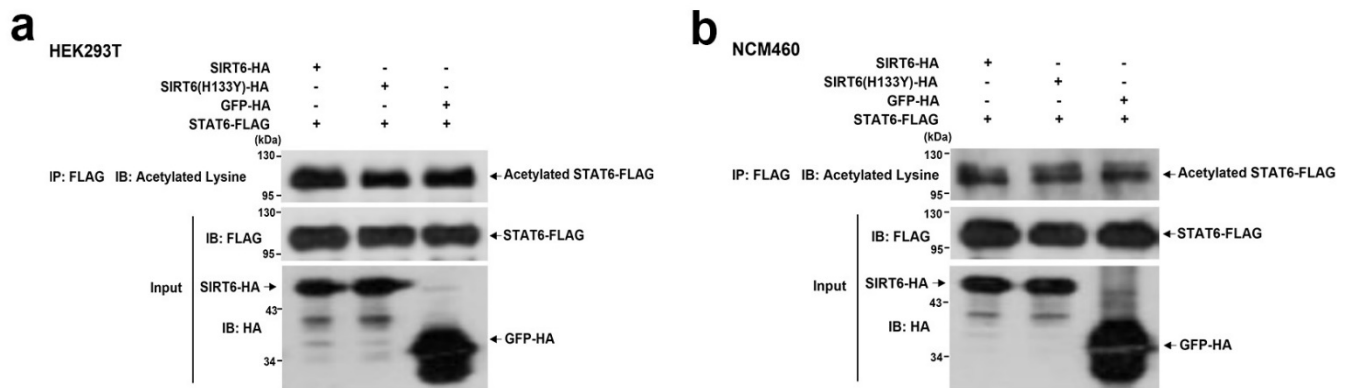

### Supplementary Fig.10. SIRT6 does not influence the acetylation status of STAT6.

**(a, b)** Effects of SIRT6 overexpression on STAT6 acetylation. STAT6-FLAG was immunoprecipitated from HEK293T cells (a) or NCM460 cells (b) transfected with SIRT6-HA or GFP-HA and blotted for total acetylation. Source data are provided as a Source Data file. Experiments were repeated two times for (a) and (b).

## Supplementary Figure 11

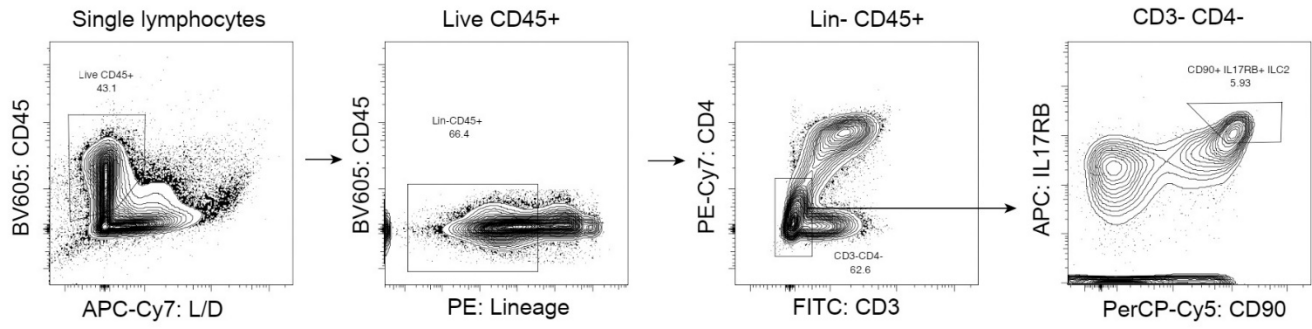

Supplementary Fig.11. Gating strategies and representative flow cytometry plots to detect ILC2s.



**Supplementary Table 1. The sequence information of the primers used in this study**

| Name                 | Species | Application | Forward (5'-3')        | Reverse (5'-3')         |
|----------------------|---------|-------------|------------------------|-------------------------|
| <i>Chga</i>          | mouse   | RT-qPCR     | ATGACAAAAGGGGACACCAA   | GTCTCCAGACACTCAGGGCT    |
| <i>Dclk1</i>         | mouse   | RT-qPCR     | TGAAGCGCCTGTACACTCTG   | CTTCTCTGGTCCACATGCAA    |
| <i>Il13</i>          | mouse   | RT-qPCR     | TGTGTCTCTCCCTCTGACCC   | CACACTCCATACCATGCTGC    |
| <i>Il25</i>          | mouse   | RT-qPCR     | AGCAGGGCCATCTCTCCT     | GTCTGTAGGCTGACGCAGTG    |
| <i>Il4</i>           | mouse   | RT-qPCR     | TGAACGAGGTCACAGGAGAA   | CGAGTCACTCTCTGTGGTG     |
| <i>Il5</i>           | mouse   | RT-qPCR     | TGGAGATTCCCATGAGCACAG  | GTAGGGACAGGAAGCCTCATC   |
| <i>Il9</i>           | mouse   | RT-qPCR     | TGCTCTTCAGTTCTGTGCTGG  | GACGGAGAGACACAAGCAGC    |
| <i>Lgr5</i>          | mouse   | RT-qPCR     | CCTACTCGAAGACTTACCCAGT | GCATTGGGGTGAATGATAGCA   |
| <i>Lyz1</i>          | mouse   | RT-qPCR     | CTGTGGGATCAATTGCAGTG   | GAATGCCTTGGGGATCTCTC    |
| <i>Muc2</i>          | mouse   | RT-qPCR     | ATGCCACCTCCTCAAAGAC    | GTAGTTTCCGTTGGAACAGTGAA |
| <i>Muc3</i>          | mouse   | RT-qPCR     | AGGAGGCTGGAGAGGACTTTG  | GCTGACATTTGCCGTAGCTGC   |
| <i>Pou2f3</i>        | mouse   | RT-qPCR     | CCCATGCACACAGAGATCAA   | GCCATTTTCGATCATTTCCTG   |
| <i>Retnlb</i>        | mouse   | RT-qPCR     | ATCAAGGAAGCTCTCAGTCG   | CCACAAGCACATCCAGTGAC    |
| <i>Sirt6</i>         | mouse   | RT-qPCR     | ACGTCAGAGACACGGTTGTG   | CCTCTACAGGCCCGAAGTC     |
| <i>Slc5a1</i>        | mouse   | RT-qPCR     | GTGGTACCGTTGGAGGCTT    | CCACAAAGTGACCACTTCCA    |
| <i>Socs3</i>         | mouse   | RT-qPCR     | GAAGATTCCGCTGGTACTGAG  | GCTGGGTCACCTTTCATAGG    |
| <i>Stat6</i>         | mouse   | RT-qPCR     | TGTCCTGGACCTCACCAAAC   | TCAGAGTCGCTAAAGCGGAG    |
| <i>Tff3</i>          | mouse   | RT-qPCR     | TCCAAGCCAATGTATGGTGC   | TGGGATACTGGAGTCAAAGC    |
| <i>Trpm5</i>         | mouse   | RT-qPCR     | ATCTTTGGGCAAATCCCTCT   | AGAGATTAGGGCAGGAAGCC    |
| <i>SOCS3</i>         | human   | RT-qPCR     | ATGAGAAGTCCAGGGGAATC   | TCTCTCTCCACCTTCCAG      |
| <i>ACTB</i> -ChIP    | human   | ChIP        | TGCAGGAAAAGTGAATCCT    | GGACCCGACCACAACTTAG     |
| <i>SOCS3</i> -ChIP-1 | human   | ChIP        | CGCCTCTGCCAGAAATCAGC   | GAGACAAAGCGCGACGAGAG    |
| <i>SOCS3</i> -ChIP-2 | human   | ChIP        | TGTGGGGCCATCTGGCAGTAG  | GATCTGCGGGAATGGCTGTC    |
| <i>SOCS3</i> -ChIP-3 | human   | ChIP        | TCAAGTGATCCTCTCGCTCC   | GGGACTCAGTGAGATTTGGAC   |

**Supplementary Table 2. The information of the primary antibodies used in this study**

| <b>Antibody</b>                        | <b>Catalog number</b> | <b>Vendor</b> | <b>Application</b> | <b>Dilution</b>            |
|----------------------------------------|-----------------------|---------------|--------------------|----------------------------|
| Actinin                                | 11313-2-AP            | Proteintech   | WB                 | 1:10000                    |
| DCLK1                                  | ab109029              | Abcam         | IHC                | 1:100                      |
| FLAG                                   | F1804                 | Sigma-Aldrich | WB&ChIP            | 1:5000 (WB)<br>1:50 (ChIP) |
| Histone H3 (acetyl K56)                | A7256                 | Abclonal      | ChIP               | 1:20                       |
| Ki67                                   | ab16667               | Abcam         | IHC                | 1:200                      |
| MYC tag                                | 60003-2-Ig            | Proteintech   | WB                 | 1:1000                     |
| MUC2                                   | sc-15334              | Santa Cruz    | IF                 | 1:200                      |
| SOCS3                                  | MAB5696-SP            | R&D Systems   | WB                 | 1:2500                     |
| SIRT6                                  | 12486                 | CST           | WB                 | 1:4000                     |
| SIRT6                                  | ab62739               | Abcam         | IF                 | 1:800                      |
| STAT6                                  | 51073-1-AP            | Proteintech   | WB                 | 1:3000                     |
| Phospho-STAT6 (Y641)                   | ab263947              | Abcam         | WB, IF             | 1:500                      |
| $\alpha$ -Tubulin                      | 11224-1-AP            | Proteintech   | WB                 | 1:20000                    |
| CD3 FITC, clone 17A2                   | 100203                | BioLegend     | Flow cytometry     | 1:100                      |
| CD4 PE/Cyanine7, clone GK1.5           | 100421                | BioLegend     | Flow cytometry     | 1:100                      |
| CD11b PE, clone M1/70                  | 101207                | BioLegend     | Flow cytometry     | 1:100                      |
| CD11c PE, clone N418                   | 117307                | BioLegend     | Flow cytometry     | 1:100                      |
| CD16/32, clone 93                      | 101319                | BioLegend     | Flow cytometry     | 1:200                      |
| CD19 PE, clone 6D5                     | 115507                | BioLegend     | Flow cytometry     | 1:100                      |
| CD45 BV510, clone 30-F11               | 103137                | BioLegend     | Flow cytometry     | 1:100                      |
| CD45R/B220 PE, clone RA3-6B2           | 103207                | BioLegend     | Flow cytometry     | 1:100                      |
| CD49b PE, clone HM $\alpha$ 2          | 103506                | BioLegend     | Flow cytometry     | 1:400                      |
| CD90.2 PerCP, clone 30-H12             | 105321                | BioLegend     | Flow cytometry     | 1:50                       |
| IL-17RB APC, clone 9B10                | 146307                | BioLegend     | Flow cytometry     | 1:50                       |
| Ly-6G/Ly-6C (Gr-1) PE, clone RB6-8C5   | 108407                | BioLegend     | Flow cytometry     | 1:100                      |
| HRP-Goat Anti-Mouse IgG (H+L)          | SA00001-1             | Proteintech   | WB                 | 1:5000                     |
| HRP-Goat Anti-Rabbit IgG (H+L)         | SA00001-2             | Proteintech   | WB                 | 1:5000                     |
| Cy3-labeled Goat Anti-Rabbit IgG (H+L) | A0516                 | Beyotime      | IF                 | 1:500                      |
